# Supplementary material
Source: publisher site journal article supplement (https://www.dovepress.com/article/504930)
Supplement: Supplementary file 1 [file get_supplementary_file.php]

The Quality Control of RNA Sample and Sequencing Data


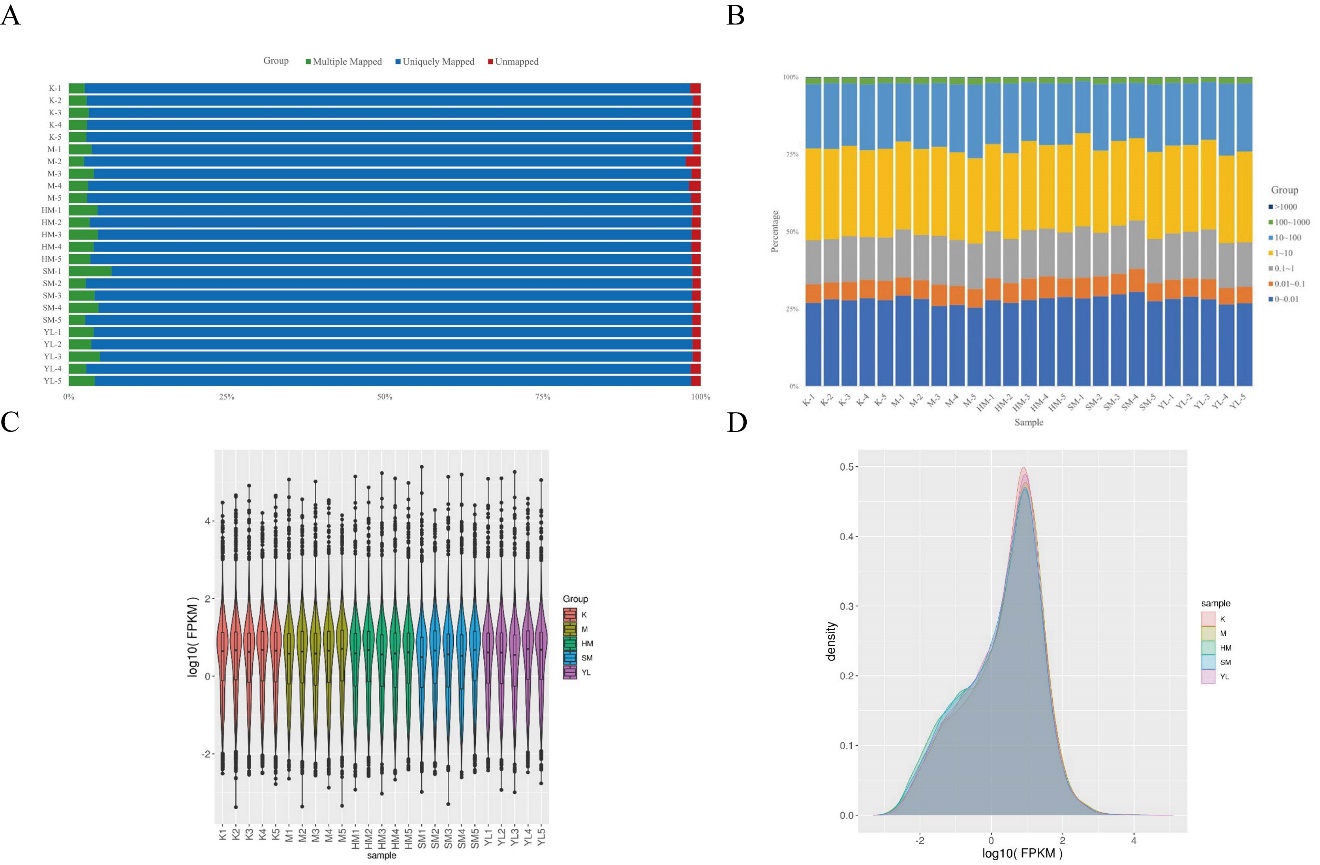


**Figure S1** Sequestration Data Quality Assessment

1. Comparison rate of reference genes. (**B**) The overall distribution of sample gene expression. (**C**) FPKM trend comparison: gene expression abundance violin plot. (**D**) FPKM trend comparison: Density distribution curve.

The Quality Control of RNA Sample and Sequencing Data

**Table S1** High-Quality Clean Reads Obtained

| **Sample ID** | **Raw reads, bp** | **Clean reads, bp** | **Clean ratio, %** | **Q20 content, /%** | **Q30 content, %** | **GC content, %** |
| --- | --- | --- | --- | --- | --- | --- |
| **Control_1** | 52,746,278 | 51,943,452 | 98.48 | 98.10 | 96.37 | 49.02 |
| **Control_2** | 53,310,834 | 52,479,666 | 98.44 | 98.16 | 96.49 | 48.45 |
| **Control_3** | 51,754,192 | 50,833,080 | 98.22 | 98.07 | 96.27 | 49.54 |
| **Control_4** | 50,153,072 | 49,249,234 | 98.20 | 98.00 | 96.18 | 49.39 |
| **Control_5** | 54,056,228 | 53,218,164 | 98.45 | 98.16 | 96.49 | 48.71 |
| **Model_1** | 39,462,780 | 38,748,682 | 98.19 | 97.96 | 96.1 | 49.39 |
| **Model_2** | 52,351,020 | 51,421,682 | 98.22 | 97.97 | 96.14 | 48.72 |
| **Model_3** | 56,284,740 | 55,307,326 | 98.26 | 98.00 | 96.18 | 50.06 |
| **Model_4** | 50,428,394 | 49,597,732 | 98.35 | 98.07 | 96.34 | 49.93 |
| **Model_5** | 50,273,674 | 49,394,202 | 98.25 | 97.98 | 96.14 | 49.52 |
| **H-M_1** | 56,828,612 | 55,930,646 | 98.42 | 98.10 | 96.38 | 50.31 |
| **H-M_2** | 52,043,152 | 51,109,620 | 98.21 | 97.96 | 96.11 | 49.29 |
| **H-M_3** | 47,547,542 | 46,777,004 | 98.38 | 98.02 | 96.23 | 50.35 |
| **H-M_4** | 52,703,624 | 51,805,290 | 98.30 | 98.02 | 96.23 | 49.91 |
| **H-M_5** | 40,133,204 | 39,407,064 | 98.19 | 98.04 | 96.23 | 49.52 |
| **S-M_1** | 42,458,504 | 41,735,402 | 98.30 | 98.04 | 96.25 | 51.78 |
| **S-M_2** | 51,541,260 | 50,724,326 | 98.41 | 98.11 | 96.42 | 49.12 |
| **S-M_3** | 44,369,472 | 43,584,412 | 98.23 | 97.92 | 95.61 | 50.16 |
| **S-M_4** | 45,282,122 | 44,502,590 | 98.28 | 97.99 | 96.15 | 50.40 |
| **S-M_5** | 45,033,966 | 44,283,122 | 98.33 | 98.05 | 96.3 | 49.42 |
| **Y-L_1** | 40,835,894 | 40,179,224 | 98.39 | 98.10 | 96.37 | 50.36 |
| **Y-L_2** | 38,173,922 | 37,529,680 | 98.31 | 98.01 | 96.22 | 49.96 |
| **Y-L_3** | 43,484,264 | 42,816,992 | 98.47 | 98.12 | 96.41 | 50.99 |
| **Y-L_4** | 37,592,348 | 36,933,476 | 98.25 | 97.98 | 96.14 | 49.65 |
| **Y-L_5** | 39,016,322 | 38,394,100 | 98.41 | 98.04 | 96.27 | 50.22 |

**Notes:** Q20, base quality score indicating a sequencing error probability of less than 1%; Q30, base quality score indicating a sequencing error probability of less than 0.1%; GC, total percentage of guanine and cytosine in the sample.
